# The American Journal of Psychiatry

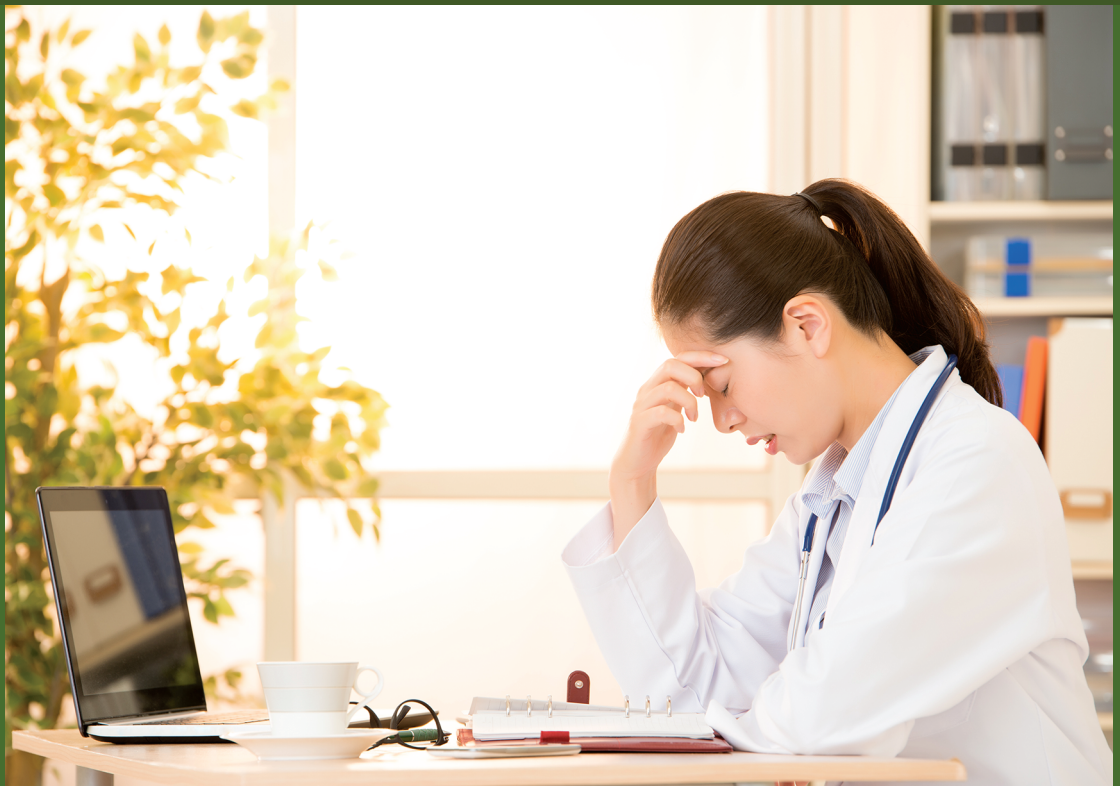

The Tired, Retired, and Recovered Physician:  
Professional Burnout Versus Major Depressive Disorder

Neuroscience of Addiction: Relevance to Prevention and Treatment

Prevalence and Correlates of Prescription Stimulant Use, Misuse,  
and Motivations for Misuse Among Adults in the United States

Familiality of Psychiatric Disorders and Risk of Postpartum  
Psychiatric Episodes: A Population-Based Cohort Study

AMERICAN  
PSYCHIATRIC  
ASSOCIATION

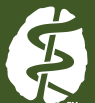

[ajp.psychiatryonline.org](http://ajp.psychiatryonline.org)
