## PERSPECTIVAS

### EDITORIALES

- 707** **Uso y abuso de los estimulantes prescritos: Implicaciones para consultas de prescripción responsables**  
*Amelia M. Arria, Ph.D., Robert L. DuPont, M.D.*
- 709** **Manejo de la medicación para pacientes con trastorno límite de la personalidad**  
*John G. Gunderson, M.D., Lois W. Choi-Kain, M.D., M.Ed.*
- 712** **Sobre el beneficio continuo de los antipsicóticos después del primer episodio de esquizofrenia**  
*René S. Kahn, M.D., Ph.D.*
- 714** **¿La depresión y los eventos estresantes causan envejecimiento prematuro?**  
*Andrew M. McIntosh, M.D., Caroline Relton, Ph.D.*

### CONFERENCIA DE CASO CLÍNICO

- 716** **El médico cansado, retirado y recuperado: El agotamiento profesional versus el trastorno de depresión mayor**  
*Erick Messias, M.D., Ph.D., Victoria Flynn, M.D.* **EMC • AUDIO**

### IMÁGENES EN PSIQUIATRÍA

- 720** **Antonio Vallejo-Nágera (1889–1960) y Juan Antonio Vallejo-Nágera Botas (1926–1990)**  
*Ethan Pearlstein, B.A., Javier I. Escobar, M.D.*

### [APA PRESIDENTIAL ADDRESSES]

- 723** **[State of Psychiatry in America]**  
*Anita S. Everett, M.D., D.F.A.P.A.*
- 726** **[Response to the Presidential Address]**  
*Altha J. Stewart, M.D.*
- 728** **[Anita S. Everett, M.D., D.F.A.P.A., 144th President, 2017–2018]**  
*Brian Hepburn, M.D.*

### REVISIÓN Y RESEÑAS

- 729** **La neurociencia de la adicción: Relevancia para la prevención y el tratamiento**  
*Nora D. Volkow, M.D., Maureen Boyle, Ph.D.*

La investigación en abuso de sustancias es única debido a los paralelos en diferentes especies con respecto a los efectos de sustancias ilícitas en el cerebro y el comportamiento. Esta revisión de datos sobre la neurociencia de la adicción informa la terapéutica y resume la investigación en un esfuerzo por comprender la adicción a través de estudios de la estructura y la función cerebrales.

## NUEVAS INVESTIGACIONES

### ARTÍCULOS

- 741** **Prevalencia y correlatos del uso, el abuso, los trastornos por consumo y los motivos de abuso de estimulantes prescritos en adultos en los Estados Unidos**

*Wilson M. Compton, M.D., M.P.E., et al.* **EDITORIALE • EMC • AUDIO**

Los motivos más comunes de abuso de medicación estimulante prescritos fueron los efectos directos para mejorar el desempeño, incluyendo el estado de alerta, la concentración o como una ayuda para el estudio. Los pacientes que están usando su medicación para la potenciación cognitiva o pasando su medicación a terceros presentan un alto riesgo.

- 756** **La efectividad clínica y costo-efectividad de la lamotrigina en el trastorno límite de la personalidad: Un ensayo aleatorizado controlado con placebo**

*Mike J. Crawford, M.D., et al.* **EDITORIALE • VIDEO**

Debido a que los pacientes con trastorno límite de la personalidad padecen dificultades del estado de ánimo, los medicamentos efectivos para los trastornos del ánimo pueden servirles. Este artículo presenta nuevos datos de un ensayo aleatorizado y controlado en trastorno límite de la personalidad para la lamotrigina, un anticonvulsivante utilizado para tratar los síntomas depresivos en pacientes con trastorno bipolar. Entre más de 150 pacientes, los investigadores no encontraron pruebas de eficacia.

## 765 Estudio de seguimiento de 20 años a nivel nacional sobre la discontinuación del tratamiento con antipsicóticos en el primer episodio de esquizofrenia

Jari Tiihonen, M.D., Ph.D., et al. EDITORIALE • AUDIO • VIDEO

Todavía hay interrogantes importantes acerca de los riesgos y los beneficios del tratamiento a largo plazo con antipsicóticos para la esquizofrenia. Esta investigación analiza más de 20.000 pacientes de Finlandia e identifica una asociación entre el riesgo reducido de re-hospitalización y la muerte en pacientes que usan antipsicóticos continuamente, en comparación con otros grupos de pacientes. Los datos también apuntan a riesgos de recaída o fracaso del tratamiento después de la discontinuación de los antipsicóticos.

## 774 Envejecimiento epigenético en el trastorno de depresión mayor

Laura K.M. Han, M.Sc., et al. EDITORIALE • AUDIO

El presente artículo brinda información nueva sobre las relaciones entre el envejecimiento, el trastorno de depresión mayor y la metilación del ADN, utilizando datos de pacientes vivos y tejidos postmortem. Los análisis sugieren que los cambios epigenéticos asociados al envejecimiento ocurren de manera más pronunciada en sujetos con un historial de depresión en comparación con individuos que no lo tienen.

## 783 Distribución familiar de los trastornos psiquiátricos y riesgo de episodios psiquiátricos postparto: Un estudio de cohorte basado en la población

Anna E. Bauer, Ph.D., et al. EMC • AUDIO

Una revisión de registros de más de 300.000 partos encuentra que un historial de trastornos psiquiátricos en familiares de primer grado varones fue igual de influyente en el riesgo de trastornos psiquiátricos postparto como un historial de trastornos psiquiátricos en familiares mujeres. Información adicional sobre la historia familiar en cualquier familiar de primer grado puede ayudar a los clínicos a predecir quién puede beneficiarse de mayor vigilancia antes de que aparezcan los síntomas, para intervenir lo antes posible.

### COMUNICADOS Y ACTUALIZACIONES

#### CARTAS AL EDITOR

## 792 Metilfenidato y apatía en la enfermedad de Alzheimer: ¿Es la apnea del sueño un efecto de confusión?

Bhanu Prakash Kolla, M.D., M.R.C.Psych., Meghna P. Mansukhani, M.D.

## 792 Abordando posibles efectos de la apnea del sueño en un estudio de metilfenidato para la apatía en la enfermedad de Alzheimer: Respuesta a Kolla y Mansukhani

Prasad R. Padala, M.D., M.S., et al.

## 793 La relación temporal entre la enfermedad de Alzheimer y los síntomas depresivos: Aspectos variables

Didier Wion, Ph.D.

#### RESEÑAS BIBLIOGRÁFICAS

## 794 Why Physicians Die by Suicide: Lessons Learned From Their Families and Others Who Cared [¿Por qué se suicidan los médicos?: Lecciones aprendidas de sus familias y otros que los querían]

Amir Garakani, M.D.

## 795 Smart & Savvy: Negotiation Strategies in Academia [Listo & inteligente: Estrategias de negociación en la academia]

Anna Kim, M.D.

#### ACTOS OFICIALES

## 796 [2017 Annual Report of the ABPN]

### OTROS TEMAS DE INTERÉS

## 795 [Correction]

## 809 Educación Médica Continuada

**Cubierta:** [Messias and Flynn (p. 716) discuss the differential diagnosis between depression and burnout in the treatment of a physician seeking early retirement because of dissatisfaction with medical practice. {Image: PR Image Factory, Shutterstock.com.}]

**AUDIO** Article is highlighted in AJP Audio, a downloadable .mp3 file available at [ajp.psychiatryonline.org](http://ajp.psychiatryonline.org)

**EDITORIALE** Article is discussed in one of the issue's editorials

**EMC** A course covering the content of this article is available online for paid subscribers to the AJP CME Course program

**VIDEO** Article is highlighted online by Deputy Editor Daniel S. Pine, M.D.

#### La Tabla de Contenidos y resúmenes de Este Número Está Disponible en Español

(Abstracts are also available in Spanish)

Translation presented in collaboration with the Office of Global Health, Rutgers-Robert Wood Johnson Medical School. Support for this effort provided by ACTA Colombia.

#### Translation courtesy of

Sergi Casals, M.A., Garuna, Medellín, Colombia ([www.garunaeditors.com](http://www.garunaeditors.com))

Carlos López Jaramillo, M.D., M.Sc., Ph.D., Universidad de Antioquia, Medellín, Colombia

Javier I. Escobar, M.D., M.Sc., Rutgers-Robert Wood Johnson Medical School

## La neurociencia de la adicción: Relevancia para la prevención y el tratamiento

Nora D. Volkow, M.D., Maureen Boyle, Ph.D.

La adicción, la forma más severa de trastorno por consumo de sustancias, es un trastorno cerebral crónico, moldeado por factores biosociales importantes, que tiene consecuencias devastadoras para los individuos y la sociedad. Nuestra comprensión del trastorno por consumo de sustancias ha avanzado de manera significativa en las 3 últimas décadas, en parte gracias al importante progreso de la investigación en genética y neurociencias y al desarrollo de nuevas tecnologías, incluyendo herramientas para interrogar cambios moleculares en poblaciones neuronales específicas en modelos animales de trastorno por consumo de sustancias, y también gracias a los dispositivos de imágenes cerebrales para evaluar la función cerebral y la neuroquímica en los humanos. Estos avances han permitido entender los procesos neurobiológicos a través de los cuales los factores biológicos y socioculturales contribuyen a la resiliencia o la vulnerabilidad al consumo de drogas, o a la adicción a las mismas. La delineación de neurocircuitos alterados en la adicción, que

incluye circuitos que median la recompensa y la motivación, el control ejecutivo y el procesamiento emocional, nos ha permitido entender los comportamientos aberrantes de los individuos adictos y ha planteado nuevos objetivos para el tratamiento. Lo más prominente son las alteraciones de la capacidad de un individuo de priorizar comportamientos que resulten en un beneficio a largo plazo por encima de los que ofrecen recompensas a corto plazo y la dificultad creciente para ejercer control sobre esos comportamientos, incluso cuando están asociados a consecuencias catastróficas. Estos avances en nuestra comprensión del desarrollo cerebral y del papel de los genes y el entorno en la estructura y función cerebrales han conformado un fundamento a partir del que se pueden desarrollar herramientas más efectivas para prevenir y tratar el trastorno por consumo de sustancias.

*(Am J Psychiatry 2018; 175:729–740)*

# Prevalencia y correlatos del uso, el abuso, los trastornos por consumo y los motivos de abuso de estimulantes prescritos en adultos en los Estados Unidos

Wilson M. Compton, M.D., M.P.E., Beth Han, M.D., Ph.D., Carlos Blanco, M.D., Ph.D., Kimberly Johnson, Ph.D., Christopher M. Jones, Pharm.D., M.P.H.

**Objetivo:** El objetivo de los autores fue examinar simultáneamente la prevalencia y los correlatos del uso, el abuso, los trastornos por consumo y los motivos de abuso de estimulantes prescritos en la población adulta de EE.UU.

**Método:** Este fue un estudio nacional representativo de población de adultos de 18 años o más en hogares, como parte de las Encuestas Nacionales sobre el Consumo de Drogas y la Salud de 2015 y 2016 (N=102.000). Las medidas incluyeron el uso de estimulantes prescritos, el uso sin abuso, el abuso sin trastornos por consumo, y el abuso con trastornos por consumo, y también características demográficas, afeciones de salud y factores de salud mental.

**Resultados:** De los adultos de EE.UU., 6,6% (promedio anual) usaron estimulantes prescritos en general; 4,5% los usaron sin abusarlos, 1,9% los abusaron pero sin trastornos por consumo y 0,2% tuvieron trastornos por consumo. Los adultos con trastornos por consumo de estimulantes prescritos en el último año no difirieron de aquellos con abuso sin trastornos por consumo en ninguna de las características sociode-

demográficas examinadas ni en muchos de los problemas de consumo de sustancias examinados. Los motivos de abuso reportados más comúnmente fueron ayudar a estar alerta o concentrarse (56,3%). La fuente más probable de los estimulantes prescritos de los que se abusaba fue obtenerlos gratis de amigos o familiares (56,9%). El abuso de estimulantes prescritos y el trastorno por consumo más frecuentes, estuvieron asociados a una mayor probabilidad de obtener medicamentos de médicos o de traficantes o extraños y una menor probabilidad de obtenerlos de amigos o familiares.

**Conclusiones:** Aproximadamente 16,0 millones de adultos de EE.UU. usaron estimulantes prescritos en el año anterior (promedio anual), 5,0 millones abusaron estimulantes prescritos y 0,4 millones tuvieron trastorno por consumo. La potenciación cognitiva fue la razón más frecuente para el mal uso de estimulantes prescritos. Los pacientes que están usando su medicación para la potenciación cognitiva o pasando su medicación a terceros presentan un alto riesgo.

(*Am J Psychiatry* 2018; 175:741–755)

## La efectividad clínica y costo-efectividad de la lamotrigina en el trastorno límite de la personalidad: Un ensayo aleatorizado, controlado con placebo

Mike J. Crawford, M.D., Rahil Sanatinia, Ph.D., Barbara Barrett, Ph.D., Gillian Cunningham, B.Sc., Oliver Dale, M.B.B.S., Poushali Ganguli, M.Sc., Geoff Lawrence-Smith, M.B.B.S., Verity Leeson, Ph.D., Fenella Lemonsky, Georgia Lykomitrou, M.Sc., Alan A. Montgomery, Ph.D., Richard Morriss, M.D., Jasna Munjiza, Ph.D., Carol Paton, B.Sc., Iwona Skorodzien, M.Sc., Vineet Singh, M.B.B.S., Wei Tan, M.Sc., Peter Tyrer, M.D., Joseph G. Reilly, D.M. [on behalf of the LABILE study team]

**Objetivo:** Los autores examinaron si la lamotrigina es un tratamiento efectivo clínicamente y costo-efectivo para personas con trastorno límite de la personalidad.

**Método:** Este fue un ensayo multicéntrico, doble ciego, aleatorizado y controlado con placebo. Entre julio de 2013 y noviembre de 2016 los autores reclutaron a 276 personas de como mínimo 18 años, que cumplían los criterios diagnósticos de trastorno límite de la personalidad. Se excluyeron los individuos que presentaban trastorno afectivo bipolar o psicosis coexistente, los que ya estaban tomando un estabilizador del ánimo y las mujeres en riesgo de embarazo. Se utilizó un servicio de aleatorización basado en la red para distribuir a los participantes aleatoriamente con un ratio de 1:1 para recibir o bien un placebo inerte o bien hasta 400 mg/día de lamotrigina. La medida primaria de resultados fue la puntuación en la escala de evaluación de Zanarini para el trastorno límite de la personalidad (ZAN-BPD) a las 52 semanas. Las medidas secundarias de resultado incluyeron síntomas depresivos, auto-lesión deliberada, funcionamiento social, cali-

dad de vida relacionada con la salud, uso y costos de recursos, efectos secundarios del tratamiento y eventos adversos.

**Resultados:** Se hizo seguimiento a un total de 195 (70,6%) participantes en la semana 52, y en ese punto 49 (36%) de los participantes del grupo de lamotrigina y 58 (42%) de los del grupo de placebo estaban tomando la medicación del estudio. La puntuación media en la escala ZAN-BPD fue 11,3 (DE=6,6) en el grupo de lamotrigina y 11,5 (DE=7,7) en el grupo de placebo (diferencia ajustada de medias=0,1; IC 95%=-1,8 a 2,0). No hubo evidencia de ninguna diferencia en las medidas secundarias. Los costos de la atención directa fueron similares en ambos grupos.

**Conclusiones:** Los resultados sugieren que tratar a los pacientes con trastorno límite de la personalidad con lamotrigina no es ni efectivo clínicamente ni costo-efectivo).

(*Am J Psychiatry* 2018; 175:756–764)

# Estudio de seguimiento de 20 años a nivel nacional sobre la discontinuación del tratamiento con antipsicóticos en el primer episodio de esquizofrenia

Jari Tiihonen, M.D., Ph.D., Antti Tanskanen, Phil.Lic., Heidi Taipale, Ph.D.

**Objetivo:** Generalmente se cree que después del primer episodio de esquizofrenia, el riesgo de recaída disminuye en pacientes que están estabilizados. Muchas guías de tratamiento recomiendan que después de la estabilización se continúe con el tratamiento con antipsicóticos de 1 a 5 años, y si es posible se evite una mayor exposición a los antipsicóticos. Sin embargo, no hay evidencia publicada que corrobore esta perspectiva. Los autores utilizaron bases de datos de toda la nación para investigar este tema.

**Método:** Se utilizaron datos de registros nacionales recogidos prospectivamente para estudiar el riesgo de fracaso del tratamiento (re-hospitalización psiquiátrica o muerte) después de discontinuar el tratamiento con antipsicóticos. Se usó la regresión multivariada de Cox para evaluar los resultados de todos los pacientes hospitalizados por primera vez con un diagnóstico de esquizofrenia en Finlandia durante el período 1996–2014 (N=8.719).

**Resultados:** El menor riesgo de re-hospitalización o muerte se observó en los pacientes que recibieron tratamiento con antipsicóticos de manera continua (cociente de riesgo ajustado=1,00), seguidos por los pacientes que discontinuaron el

uso de medicamentos antipsicóticos inmediatamente después del alta del primer tratamiento hospitalario (cociente de riesgo=1,63; IC 95%=1,52–1,75), en el plazo de 1 año (cociente de riesgo=1,88; IC 95%=1,57–2,24), en el plazo de 1–2 años (cociente de riesgo=2,12; IC 95%=1,43–3,14), en el plazo de 2–5 años (cociente de riesgo=3,26; IC 95%=2,07–5,13), y después de 5 años (una mediana de 7,9 años) (cociente de riesgo=7,28; IC 95%=2,78–19,05). El riesgo de muerte fue 174%–214% más alto para los que no usaron antipsicóticos y para los pacientes con discontinuación temprana de los antipsicóticos en comparación con los pacientes que recibieron tratamiento con antipsicóticos de manera continua por hasta 16,4 años.

**Conclusiones:** Sin importar los mecanismos subyacentes, estos resultados ofrecen evidencia de que, en contra de la creencia general, el riesgo de fracaso de tratamiento o de recaída después de la discontinuación del uso de antipsicóticos no disminuye como función del tiempo durante los 8 primeros años de enfermedad y que el tratamiento con antipsicóticos a largo plazo está asociado a mayor supervivencia.

(*Am J Psychiatry* 2018; 175:765–773)

## Envejecimiento epigenético en el trastorno de depresión mayor

Laura K.M. Han, M.Sc., Moji Aghajani, Ph.D., Shaunna L. Clark, Ph.D., Robin F. Chan, Ph.D., Mohammad W. Hattab, Ph.D., Andrey A. Shabalin, Ph.D., Min Zhao, D.D.S., Gaurav Kumar, Ph.D., Lin Ying Xie, M.Sc., Rick Jansen, Ph.D., Yuri Milaneschi, Ph.D., Brian Dean, Ph.D., Karolina A. Aberg, Ph.D., Edwin J.C.G. van den Oord, Ph.D., Brenda W.J.H. Penninx, Ph.D.

**Objetivo:** El trastorno de depresión mayor está asociado a un riesgo aumentado de mortalidad y de enfermedades relacionadas con el envejecimiento. Los autores examinaron si la depresión mayor está asociada a un mayor envejecimiento epigenético en la sangre, medido por los patrones de metilación del ADN (DNAm), si las características clínicas de la depresión mayor tienen un mayor impacto en estos patrones, y si estos hallazgos se duplican en el tejido cerebral.

**Método:** La edad de la metilación del ADN se estimó utilizando todos los sitios de metilación en sangre de 811 pacientes deprimidos y 319 sujetos control sin ningún trastorno psiquiátrico a lo largo de la vida y con niveles bajos de síntomas depresivos del Estudio de Depresión y Ansiedad de Holanda. Se calcularon los residuos de los estimados de edad de la metilación del ADN, de los que se calculó el coeficiente de regresión con respecto a la edad cronológica, para indicar el envejecimiento genético. Se evaluaron el diagnóstico de depresión mayor y las características clínicas con cuestionarios y entrevistas psiquiátricas. Los análisis se ajustaron para las características sociodemográficas, el estilo de vida y el estado de salud. Para la réplica (duplicación?) se utilizaron muestras cerebrales postmortem de 74 pacientes deprimidos y 64 sujetos de control. Se realizó análisis de enriquecimiento de

vías (*pathways*) utilizando *ConsensusPathDB* para obtener información de los procesos biológicos subyacentes al envejecimiento epigenético en sangre y cerebro.

**Resultados:** Se observó envejecimiento epigenético significativamente mayor en pacientes con depresión mayor en comparación con los sujetos control ( $d$  de Cohen=0,18), con un efecto de dosis significativo con mayor gravedad de los síntomas en la muestra general. En el grupo de depresión, el envejecimiento epigenético estuvo asociado positivamente y de manera significativa a la puntuación de trauma en la infancia. La diferencia caso-control se replicó en una serie de datos independiente de muestras cerebrales postmortem. Los principales términos enriquecidos de Ontología Génica incluyeron procesos neuronales.

**Conclusiones:** En comparación con los sujetos control, los pacientes con depresión mayor exhibieron más envejecimiento epigenético en sangre y tejido cerebral, lo que sugiere que biológicamente son más viejos que su edad cronológica correspondiente. Este efecto fue incluso más profundo en presencia de trauma en la infancia.

(*Am J Psychiatry* 2018; 175:774–782)

## Distribución familiar de los trastornos psiquiátricos y riesgo de episodios psiquiátricos postparto: Un estudio de cohorte basado en la población

Anna E. Bauer, Ph.D., Merete L. Maegbaek, M.Sc., Xiaoqin Liu, Ph.D., Naomi R. Wray, Ph.D., Patrick F. Sullivan, M.D., F.R.A.N.Z.C.P., William C. Miller, M.D., Samantha Meltzer-Brody, M.D., Trine Munk-Olsen, Ph.D.

**Objetivo:** Son comunes los trastornos psiquiátricos postparto y las complicaciones mórbidas del embarazo. Los autores se propusieron evaluar cómo el historial de trastornos psiquiátricos está asociado a los trastornos psiquiátricos postparto en madres índice (probands) con y sin un historial psiquiátrico anterior, evaluando el grado de relación, el tipo de trastorno y el sexo de los miembros de la familia.

**Método:** Los autores asociaron los registros daneses de la fecha de nacimiento y el tratamiento psiquiátrico para evaluar el riesgo familiar de episodios psiquiátricos postparto en una cohorte nacional basada en la población. Los sujetos índice (probands) fueron madres primíparas que habían nacido en Dinamarca en 1970 o después y que habían dado a luz después de los 15 años y antes del 31 de diciembre de 2012 (N=362.462). La exposición primaria fue un trastorno psiquiátrico diagnosticado en un familiar. Se utilizaron modelos de regresión de Cox para estimar el cociente de riesgo de los trastornos psiquiátricos postparto en madres índice (probands).

**Resultados:** El riesgo relativo de trastornos psiquiátricos en el periodo de postparto fue elevado cuando familiares de primer grado tenían un trastorno psiquiátrico (cociente de riesgo=1.45, IC 95%=1,28 a 1,65) y alcanzó el punto máximo cuando las madres índice (probands) tenían un familiar de primer grado con trastorno bipolar (cociente de riesgo=2,86; IC 95%=1,88 a 4,35). Las asociaciones fueron más fuertes entre madres índice sin historial psiquiátrico previo. No hubo diferencias notables por el sexo del familiar.

**Conclusiones:** El historial familiar de trastornos psiquiátricos, especialmente el trastorno bipolar, es un importante factor de riesgo de trastornos psiquiátricos. Para ayudar en la identificación de mujeres en riesgo de trastornos psiquiátricos postparto, los temas relacionados con los familiares de primer grado mujeres y hombres con trastorno bipolar son de gran importancia y se deberían incluir en las guías rutinarias de evaluación clínica para mejorar la predicción de riesgo.

(*Am J Psychiatry* 2018; 175:783–791)
